# Supplementary material for: Influence of Drug–Drug Interactions on the Pharmacokinetics of Atorvastatin and Its Major Active Metabolite ortho-OH-Atorvastatin in Aging People Living with HIV
Source: Springer Nature journal article supplement (doi:10.1007/s40262-020-00876-0), 2020-04-12

## Electronic Supplementary File

### *Clinical Pharmacokinetics*

#### **Influence of drug-drug interactions on the pharmacokinetics of atorvastatin and its major active metabolite ortho-OH-atorvastatin in aging people living with HIV**

Perrine Courlet, Laurent A. Decosterd, Susana Alves Saldanha, Matthias Cavassini, Felix Stader, Marcel Stoeckle, Thierry Buclin, Catia Marzolini, Chantal Csajka, Monia Guidi and the Swiss HIV Cohort Study.

#### **Correspondence:**

Chantal Csajka, Centre for Research and Innovation in Clinical Pharmaceutical Sciences, Lausanne University Hospital and University of Lausanne, CH-1011 Lausanne, Switzerland; Rue du Bugnon 17, 1005 Lausanne, Switzerland  
E-mail: [chantal.csajka@chuv.ch](mailto:chantal.csajka@chuv.ch)

<https://doi.org/10.1007/s40262-020-00876-0>

#### **Supplementary file S1**

Goodness-of-fit plots of atorvastatin **(1)** and o-OH-atorvastatin **(2)** final population PK model. Loess smooth curves are printed in grey. a) Observed concentrations vs. individual predictions; line of identity is printed in black. b) Observed concentrations vs. population predictions; identity line is printed in black. c) Conditional weighted residuals (CWRES) vs. population predictions; ordinate value zero line is printed in black. d) CWRES vs. time post-dose; ordinate value zero line is printed in black)

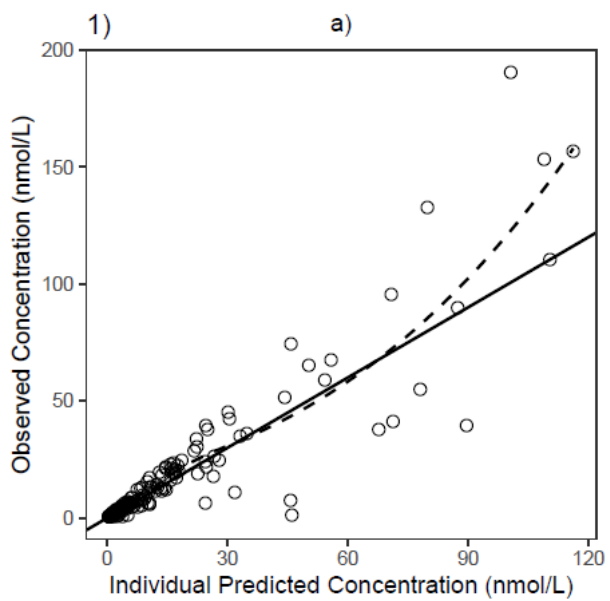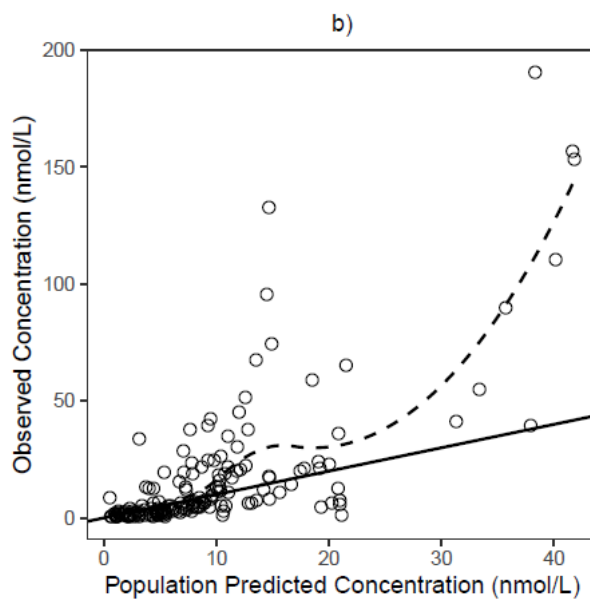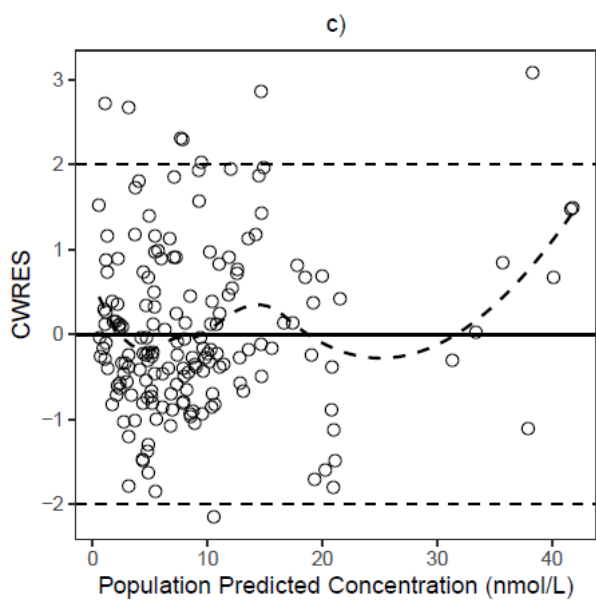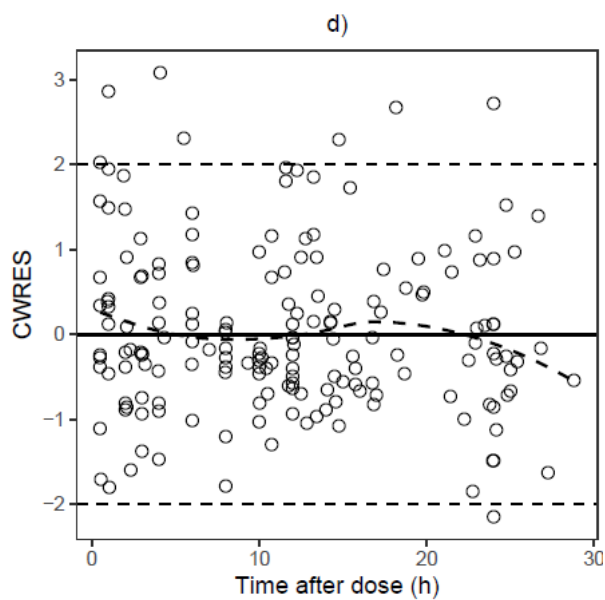

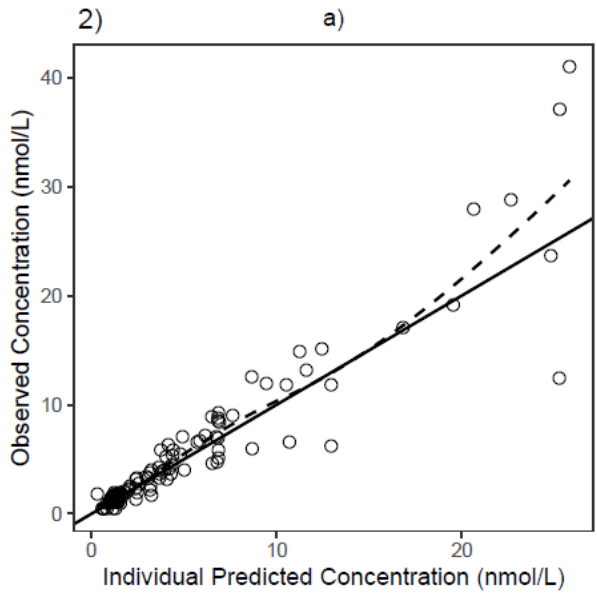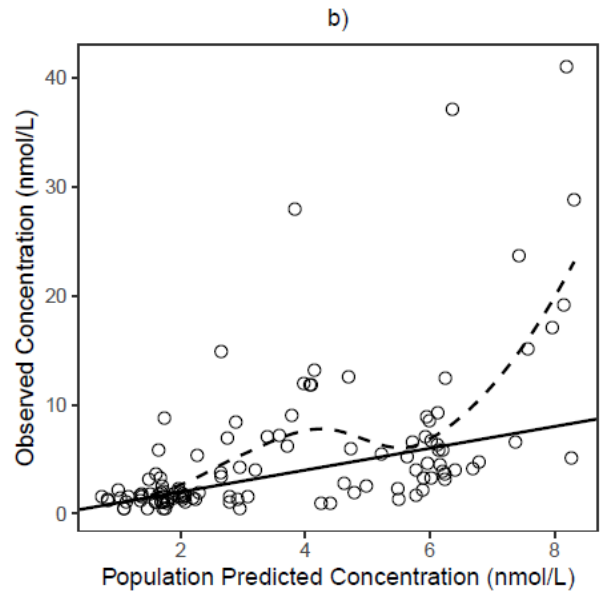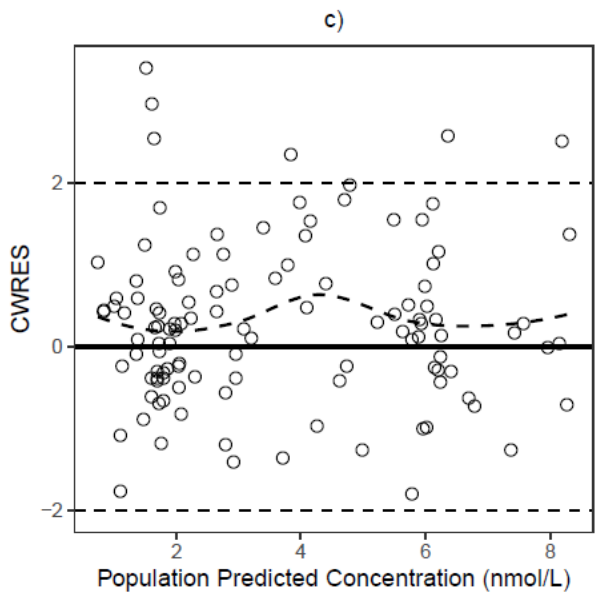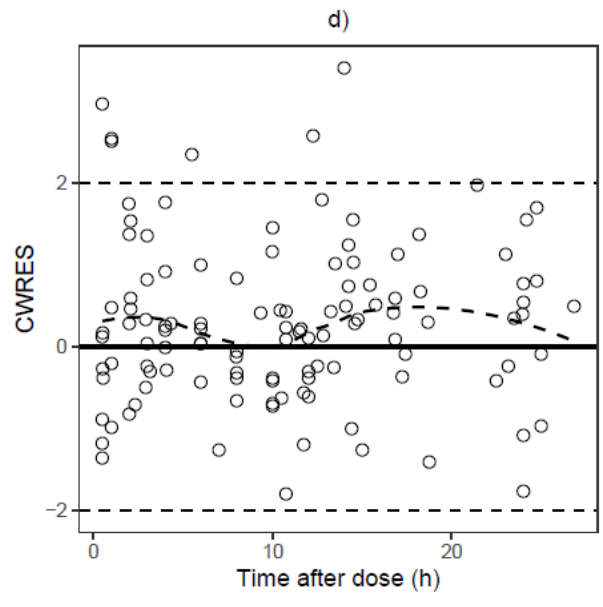

Supplement: MOESM1 [file 17888152]
